# Supplementary material for: Analysis of archived residual newborn screening blood spots after whole genome amplification
Source: PubMed Central journal article supplement (PMC4535253; doi:10.1186/s12864-015-1747-2), 2015-08-13
Supplement: 12864_2015_1747_MOESM1_ESM.pdf [file 12864_2015_1747_MOESM1_ESM.pdf]

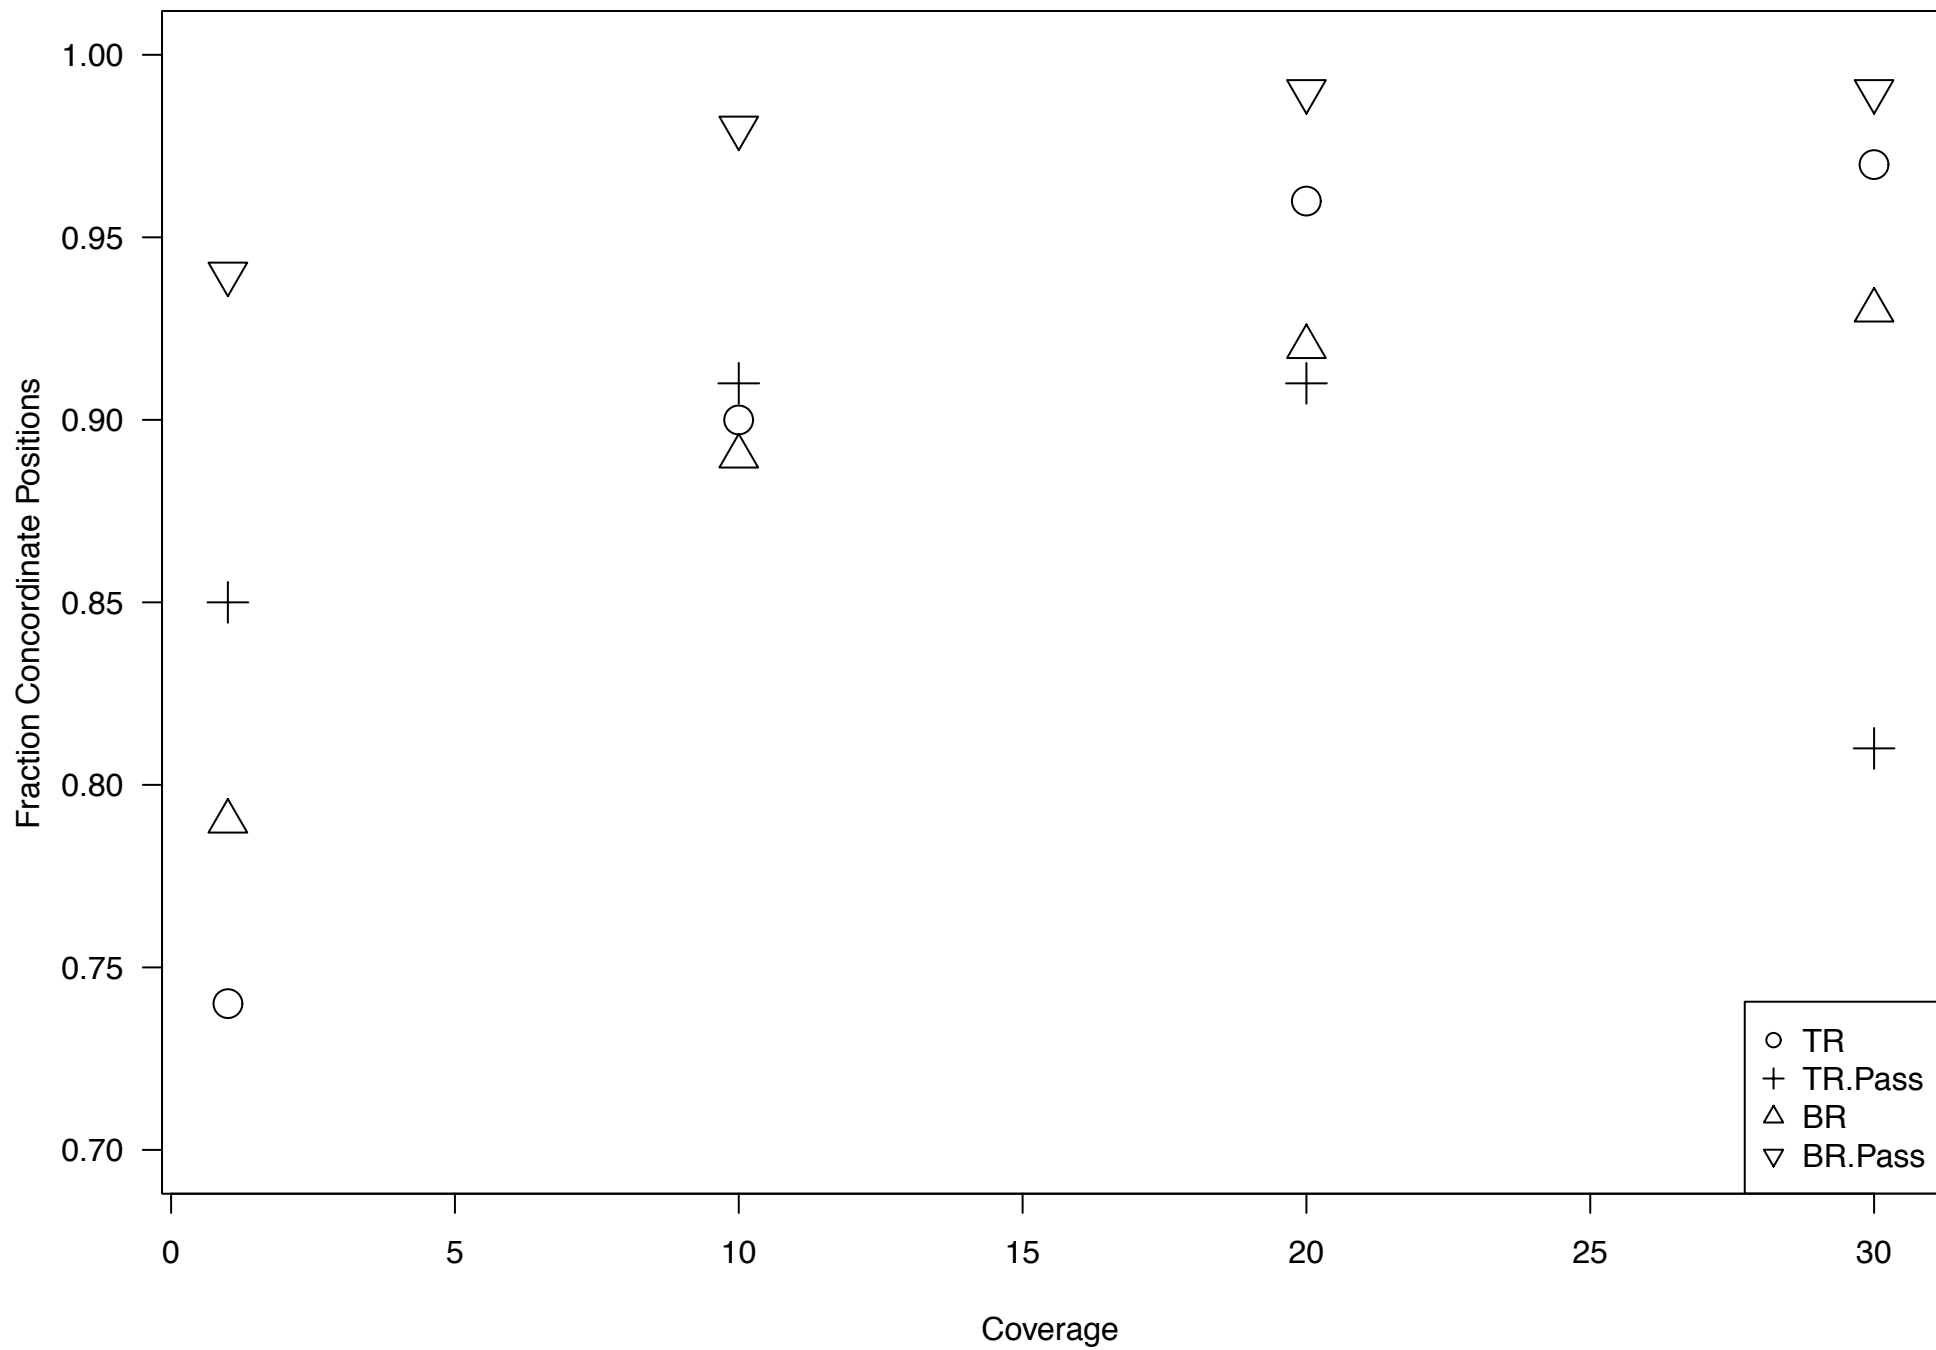

Figure S1
